# Supplementary material
Source: Springer Nature journal article supplement (https://www.springermedizin.de/resource/supplementary/12865_2007_160_MOESM7_ESM.pdf/9428636)

PKH-67

(infected DC)

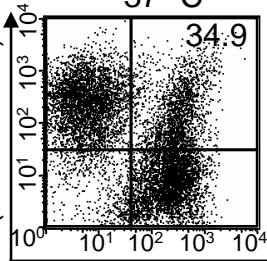

4 °C

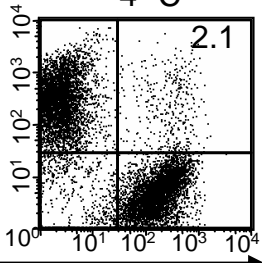

PKH-26 (uninfected DC)

Supplement: MOESM7 [file 9428636]
